# Supplementary material
Source: PubMed Central journal article supplement (PMC5027176)

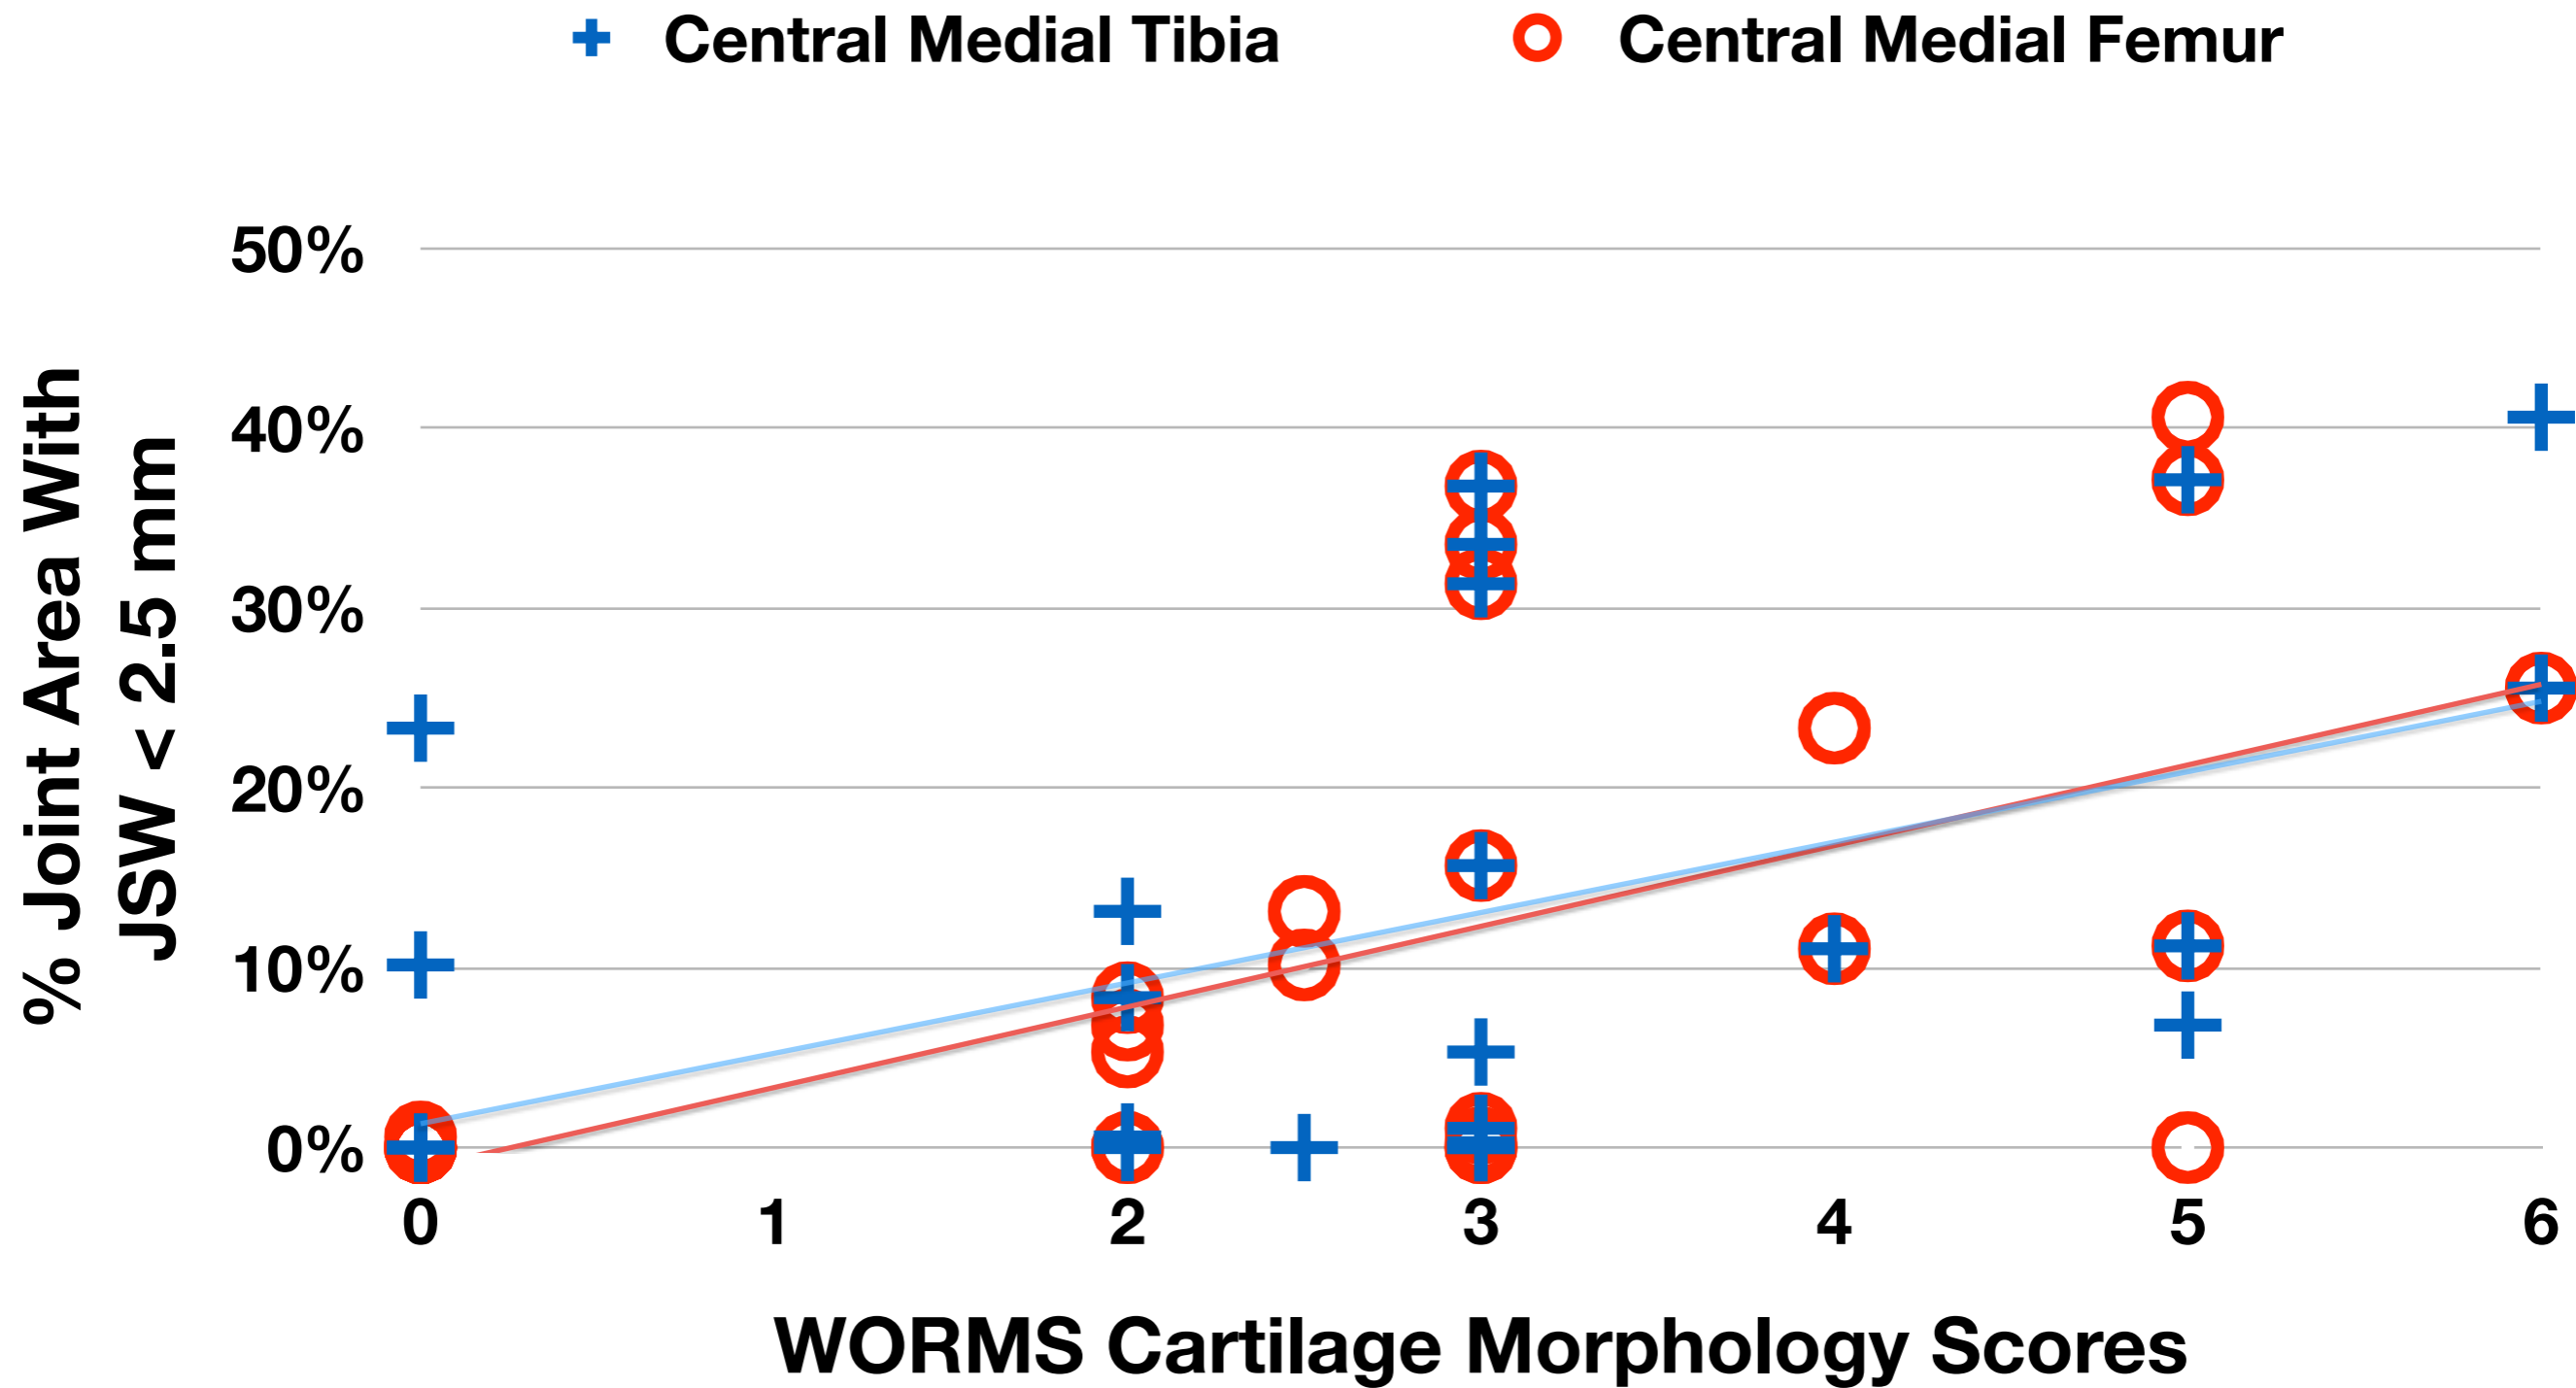

**+ Central Medial Tibia**

**○ Central Medial Femur**

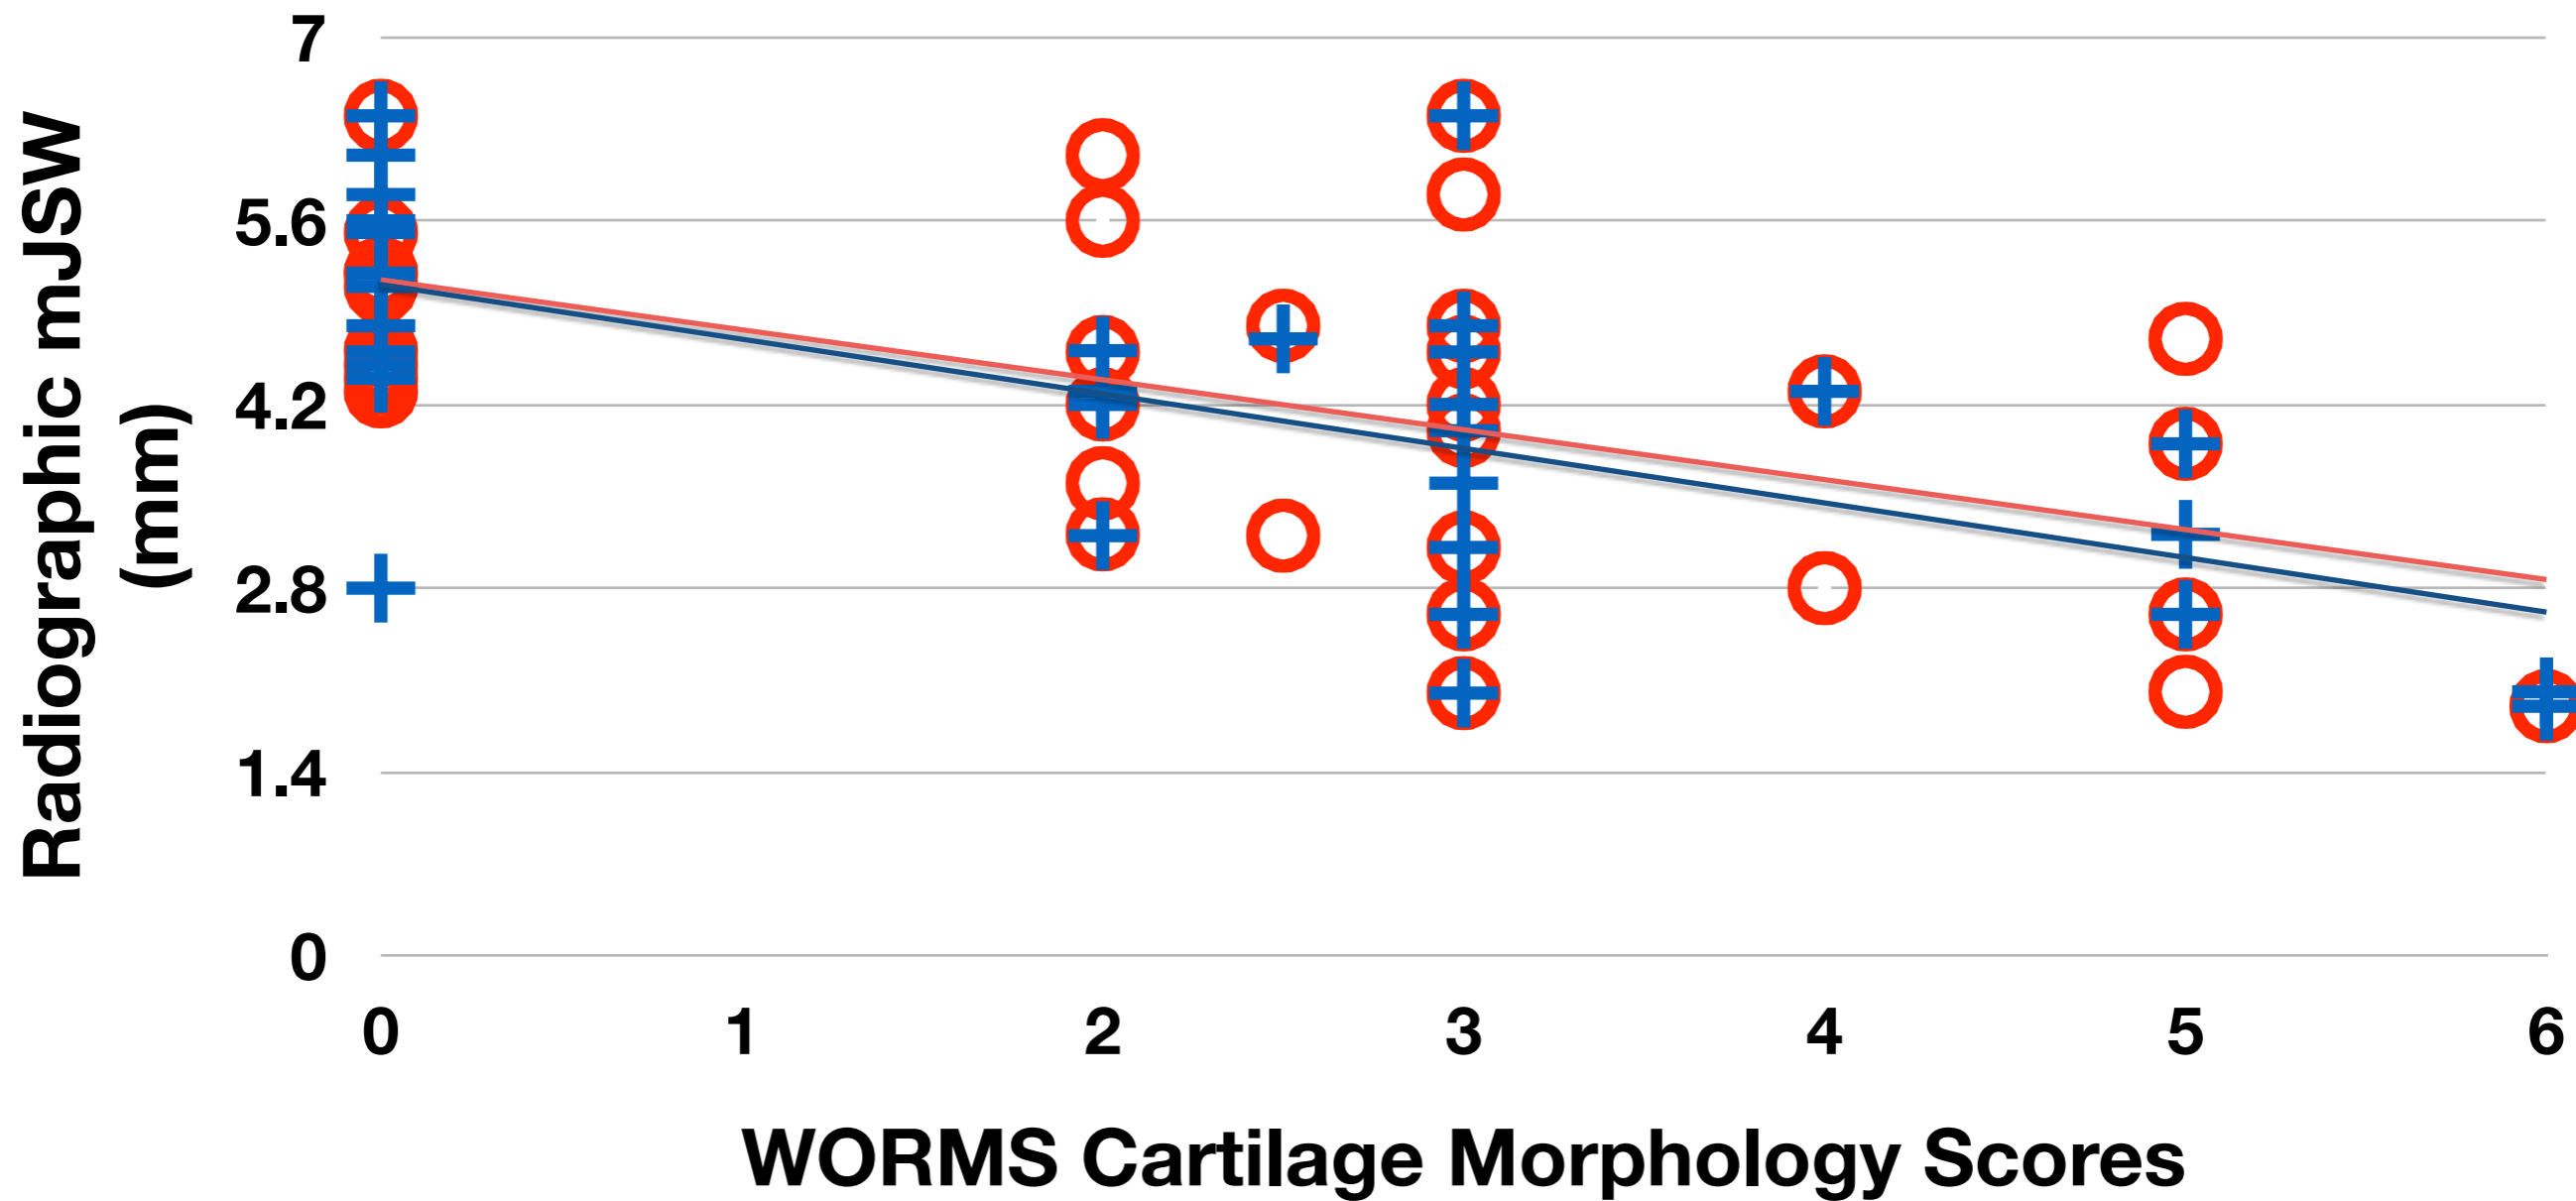

Supplement: NIHMS770754-supplement-Supp_info.pdf [file NIHMS770754-supplement-Supp_info.pdf]
